# Supplementary material
Source: MDPI journal article supplement (https://www.mdpi.com/2227-7390/11/11/2457)
Supplement: s1 [file s1]

Examples of maximal  $(v, 6, 2, 1)$  OOCs

| $v$ | $b_O$ | $b_1$ | $M$ | all          | codeword-sets |                |                |                |  |
|-----|-------|-------|-----|--------------|---------------|----------------|----------------|----------------|--|
| 40  | 2     | 2     | 2   | 1            | 1 3 4 13 31   | 5 11 19 26 34  |                |                |  |
| 42  | 2     | 2     | 2   | 1            | 1 7 11 32 36  | 3 8 22 27 30   |                |                |  |
| 44  | 2     | 2     | 2   | 1            | 1 3 4 12 36   | 5 15 21 28 34  |                |                |  |
| 45  | 3     | 2     | 2   | 2            | 1 4 5 14 36   | 2 8 20 26 28   |                |                |  |
| 46  | 3     | 2     | 2   | 10           | 1 2 15 24 33  | 4 10 21 29 40  |                |                |  |
| 47  | 3     | 2     | 2   | 7            | 1 3 4 15 36   | 6 13 19 29 37  |                |                |  |
| 48  | 3     | 2     | 2   | 58           | 1 2 7 25 43   | 3 16 20 31 35  |                |                |  |
| 49  | 3     | 2     | 2   | 33           | 1 3 4 10 43   | 5 13 24 32 37  |                |                |  |
| 50  | 3     | 2     | 2   | 165          | 1 2 5 26 47   | 6 12 23 34 43  |                |                |  |
| 51  | 3     | 2     | 2   | 200          | 1 3 4 11 44   | 5 14 20 36 42  |                |                |  |
| 52  | 3     | 2     | 2   | 506          | 1 2 5 27 49   | 6 13 24 34 45  |                |                |  |
| 53  | 3     | 2     | 2   | 433          | 1 2 4 8 47    | 5 16 25 36 41  |                |                |  |
| 54  | 3     | 3     | 2   | 2251         | 1 2 5 28 51   | 6 13 25 35 47  |                |                |  |
| 55  | 3     | 3     | 2   | 1967         | 1 2 4 8 49    | 5 16 21 33 42  |                |                |  |
| 56  | 3     | 3     | 2   | 6246         | 1 2 5 29 53   | 6 16 26 42 49  |                |                |  |
| 57  | 3     | 3     | 2   | 6944         | 1 2 4 8 51    | 5 16 29 40 45  |                |                |  |
| 58  | 3     | 3     | 2   | 15874        | 1 2 5 30 55   | 6 20 27 37 44  |                |                |  |
| 59  | 3     | 3     | 2   | 12861        | 1 2 4 8 53    | 5 16 25 36 41  |                |                |  |
| 60  | 4     | 3     | 3   | 1            | 2 10 16 46 52 | 1 4 35 38 39   | 5 12 17 32 45  |                |  |
| 61  | 4     | 3     | 3   | 2            | 1 3 13 15 16  | 6 17 24 43 50  | 4 9 31 36 40   |                |  |
| 62  | 4     | 3     | 3   | 9            | 2 8 32 56     | 5 17 27 40 50  | 3 18 21 37 46  |                |  |
| 63  | 4     | 3     | 3   | 10           | 1 3 4 21 46   | 7 15 29 41 55  | 5 11 16 35 44  |                |  |
| 64  | 4     | 3     | 3   | 52           | 1 2 5 33 61   | 6 19 30 43 49  | 7 17 29 46 55  |                |  |
| 65  | 4     | 3     | 3   | 42           | 1 3 4 11 58   | 5 17 32 44 49  | 6 20 29 42 51  |                |  |
| 66  | 4     | 3     | 3   | 313          | 1 2 6 34 62   | 7 16 30 43 57  | 3 11 22 48 51  |                |  |
| 67  | 4     | 3     | 3   | 186          | 1 3 4 12 59   | 6 16 34 44 50  | 5 19 26 40 45  |                |  |
| 68  | 4     | 3     | 3   | 987          | 1 2 5 35 65   | 6 17 31 43 57  | 7 16 23 36 55  |                |  |
| 69  | 4     | 3     | 3   | 1250         | 1 2 4 23 48   | 8 18 32 45 59  | 5 11 20 54 63  |                |  |
| 70  | 4     | 3     | 3   | 5654         | 1 2 5 36 67   | 7 20 33 50 60  | 6 15 29 47 61  |                |  |
| 71  | 4     | 3     | 3   | 3477         | 1 2 4 8 65    | 9 21 30 43 58  | 5 16 36 47 52  |                |  |
| 72  | 4     | 4     | 3   | 21487        | 3 6 12 24 54  | 5 10 25 41 57  | 1 8 27 34 35   |                |  |
| 73  | 4     | 4     | 3   | 13547        | 1 2 4 8 67    | 5 20 32 47 52  | 9 25 38 49 60  |                |  |
| 74  | 4     | 4     | 4   | 1            | 1 4 14 17 18  | 5 11 35 41 46  | 7 15 47 55 62  | 2 22 31 51 53  |  |
| 75  | 5     | 4     | 3   | 91956        | 1 2 4 7 70    | 8 22 37 51 59  | 10 21 41 52 62 |                |  |
| 76  | 5     | 4     | 3   | 217428       | 1 2 5 39 73   | 7 14 29 54 65  | 6 23 33 50 56  |                |  |
| 77  | 5     | 4     | 4   | 1            | 1 3 22 56 75  | 8 23 37 52 60  | 4 10 36 45 71  | 7 18 46 57 64  |  |
| 78  | 5     | 4     | 4   | 6            | 1 2 29 40 51  | 6 21 37 52 58  | 4 14 23 59 68  | 5 12 17 30 65  |  |
| 79  | 5     | 4     | 4   | 10           | 1 3 15 17 18  | 5 11 41 47 52  | 4 24 28 50 57  | 8 21 31 56 66  |  |
| 80  | 5     | 4     | 4   | 52           | 1 2 5 41 77   | 6 28 37 49 58  | 7 18 34 53 69  | 10 23 33 48 65 |  |
| 81  | 5     | 4     | 4   | 72           | 1 3 4 12 73   | 5 19 44 58 63  | 6 22 35 51 57  | 7 17 38 48 55  |  |
| 82  | 5     | 4     | 4   | 428          | 1 2 5 42 79   | 9 21 30 44 68  | 6 17 49 60 66  | 7 26 36 55 62  |  |
| 83  | 5     | 4     | 4   | 320          | 1 3 4 11 76   | 5 25 37 57 62  | 9 24 38 54 68  | 6 19 42 55 61  |  |
| 84  | 5     | 4     | 4   | 3734         | 1 2 5 43 81   | 9 20 48 59 68  | 6 24 37 55 61  | 7 19 26 40 70  |  |
| 85  | 5     | 4     | 4   | 2510         | 1 2 4 8 79    | 9 22 46 59 68  | 11 23 43 55 66 | 5 21 36 52 57  |  |
| 86  | 5     | 4     | 4   | 12360        | 1 2 5 44 83   | 6 22 38 60 73  | 9 24 34 49 58  | 7 18 30 63 75  |  |
| 87  | 5     | 4     | 4   | 13035        | 1 2 4 7 82    | 8 22 30 50 67  | 11 24 47 60 71 | 10 25 43 58 68 |  |
| 88  | 5     | 4     | 4   | 65033        | 1 2 5 45 85   | 7 21 28 46 70  | 10 22 41 57 76 | 6 23 32 38 61  |  |
| 89  | 5     | 4     | 4   | 46355        | 1 2 4 7 84    | 11 26 37 55 71 | 10 24 43 57 67 | 8 21 48 61 69  |  |
| 90  | 6     | 5     | 4   | $\geq 20925$ | 1 2 5 46 87   | 9 19 33 43 52  | 7 22 35 62 75  | 6 23 29 54 65  |  |

|     |   |   |   |              |                 |                |                 |                |                 |
|-----|---|---|---|--------------|-----------------|----------------|-----------------|----------------|-----------------|
| 91  | 6 | 5 | 4 | $\geq 5442$  | 1 2 4 7 86      | 8 21 34 60 68  | 10 25 35 55 71  | 11 22 40 54 73 |                 |
| 92  | 6 | 5 | 4 | $\geq 26215$ | 1 2 5 47 89     | 7 40 55 66 77  | 6 27 41 62 68   | 9 18 28 38 67  |                 |
| 93  | 6 | 5 | 5 | 3            | 1 3 4 18 79     | 8 24 35 66 77  | 6 13 36 43 49   | 5 26 38 60 72  | 9 19 28 48 73   |
| 94  | 6 | 5 | 5 | 12           | 1 2 7 48 89     | 13 27 50 64 77 | 9 24 34 69 79   | 3 11 32 65 86  | 4 20 56 72 76   |
| 95  | 6 | 5 | 5 | 18           | 1 3 4 15 84     | 9 19 43 53 62  | 8 28 36 57 74   | 6 31 47 54 70  | 5 18 55 68 73   |
| 96  | 6 | 5 | 5 | 106          | 1 2 5 49 93     | 6 18 41 61 84  | 7 16 33 70 87   | 10 29 39 60 75 | 11 24 38 51 62  |
| 97  | 6 | 5 | 5 | 95           | 1 3 4 9 92      | 7 28 43 64 71  | 11 27 50 66 77  | 10 22 51 63 73 | 13 30 48 65 78  |
| 98  | 6 | 5 | 5 | 1150         | 1 2 5 50 95     | 12 25 44 66 85 | 6 29 39 62 68   | 7 27 34 58 74  | 9 18 55 70 81   |
| 99  | 6 | 5 | 5 | 934          | 1 2 4 33 68     | 5 15 26 78 89  | 12 28 40 58 81  | 6 14 48 57 91  | 7 20 27 44 82   |
| 100 | 6 | 5 | 5 | $\geq 1165$  | 1 2 5 51 97     | 10 31 47 68 78 | 7 19 26 43 83   | 6 29 44 67 73  | 11 25 45 59 70  |
| 101 | 6 | 5 | 5 |              | 1 2 4 7 96      | 14 31 51 68 82 | 10 28 49 67 77  | 8 23 48 63 71  | 11 43 56 69 85  |
| 102 | 6 | 5 | 5 |              | 1 2 5 52 99     | 7 21 28 46 84  | 10 33 45 68 78  | 13 29 42 61 83 | 6 17 26 37 43   |
| 103 | 6 | 5 | 5 |              | 1 2 4 7 98      | 8 30 38 61 80  | 11 26 40 55 66  | 10 27 51 68 78 | 13 33 49 69 82  |
| 104 | 6 | 5 | 5 |              | 1 2 5 53 101    | 6 12 24 43 61  | 11 25 46 69 90  | 7 16 66 75 82  | 10 30 40 72 87  |
| 105 | 7 | 5 | 5 |              | 1 2 4 7 100     | 8 16 42 71 92  | 15 32 51 68 83  | 10 28 38 58 85 | 11 25 56 70 81  |
| 106 | 7 | 5 | 5 |              | 1 2 5 54 103    | 7 33 62 73 84  | 9 23 65 79 88   | 10 34 47 71 81 | 12 28 43 58 86  |
| 107 | 7 | 5 | 5 |              | 1 2 4 7 102     | 8 33 63 74 85  | 15 31 46 65 88  | 10 28 38 64 81 | 13 27 48 62 75  |
| 108 | 7 | 6 | 5 |              | 6 12 24 42 72   | 1 2 5 55 105   | 13 28 59 74 87  | 11 25 51 68 94 | 7 16 23 45 86   |
| 109 | 7 | 6 | 6 |              | 1 3 12 98 107   | 4 20 48 64 68  | 6 24 58 76 82   | 10 25 35 56 88 | 8 30 38 67 80   |
|     |   |   |   |              | 7 26 43 62 69   |                |                 |                |                 |
| 110 | 7 | 6 | 6 |              | 1 2 36 56 76    | 7 28 39 60 67  | 3 8 26 87 105   | 4 19 66 81 85  | 10 24 69 83 93  |
|     |   |   |   |              | 6 22 52 64 94   |                |                 |                |                 |
| 111 | 7 | 6 | 6 |              | 1 3 4 11 104    | 5 30 50 75 80  | 6 35 48 69 82   | 12 26 58 72 84 | 16 33 56 73 89  |
|     |   |   |   |              | 9 24 68 83 92   |                |                 |                |                 |
| 112 | 7 | 6 | 6 |              | 1 2 7 57 107    | 3 14 36 79 101 | 8 26 49 67 75   | 9 24 51 70 97  | 4 17 21 52 81   |
|     |   |   |   |              | 10 30 40 68 84  |                |                 |                |                 |
| 113 | 7 | 6 | 6 |              | 1 3 4 11 106    | 15 31 63 79 94 | 13 36 53 73 90  | 9 21 66 78 87  | 6 28 58 80 86   |
|     |   |   |   |              | 5 29 43 67 72   |                |                 |                |                 |
| 114 | 7 | 6 | 6 |              | 6 12 24 42 90   | 1 2 9 58 107   | 11 31 50 70 81  | 5 27 52 74 79  | 3 17 71 85 88   |
|     |   |   |   |              | 10 23 38 51 61  |                |                 |                |                 |
| 115 | 7 | 6 | 6 |              | 1 2 4 7 111     | 13 37 53 77 90 | 12 29 41 71 85  | 15 34 49 69 95 | 10 32 60 82 92  |
|     |   |   |   |              | 9 18 36 57 88   |                |                 |                |                 |
| 116 | 7 | 6 | 6 |              | 1 2 5 59 113    | 6 23 46 52 87  | 9 27 47 78 98   | 11 30 44 83 97 | 7 43 55 68 80   |
|     |   |   |   |              | 10 32 42 66 92  |                |                 |                |                 |
| 117 | 7 | 6 | 6 |              | 1 2 4 7 112     | 13 30 64 81 94 | 11 35 56 72 93  | 10 28 67 85 9  | 8 27 52 71 79   |
|     |   |   |   |              | 14 29 43 69 84  |                |                 |                |                 |
| 118 | 7 | 6 | 6 |              | 1 2 5 60 115    | 7 17 44 71 88  | 9 21 41 86 106  | 6 19 76 89 95  | 11 25 36 51 103 |
|     |   |   |   |              | 16 34 50 72 96  |                |                 |                |                 |
| 119 | 7 | 6 | 6 |              | 1 2 4 7 114     | 11 22 49 76 98 | 15 35 50 75 94  | 8 26 56 74 82  | 10 23 39 52 62  |
|     |   |   |   |              | 14 31 55 72 86  |                |                 |                |                 |
| 120 | 8 | 6 | 6 |              | 6 12 24 54 102  | 1 2 5 61 117   | 15 36 62 83 98  | 7 16 35 92 111 | 10 23 33 50 103 |
|     |   |   |   |              | 11 31 45 86 100 |                |                 |                |                 |
| 121 | 8 | 6 | 6 |              | 1 2 4 7 116     | 10 23 36 72 98 | 14 39 54 81 96  | 8 24 68 84 92  | 17 35 55 73 90  |
|     |   |   |   |              | 11 22 52 74 102 |                |                 |                |                 |
| 122 | 8 | 6 | 6 |              | 1 2 5 62 119    | 7 14 28 49 87  | 10 33 44 55 77  | 9 36 56 83 92  | 12 29 53 70 82  |
|     |   |   |   |              | 6 19 37 91 109  |                |                 |                |                 |
| 123 | 8 | 6 | 6 |              | 1 2 4 7 118     | 8 16 32 56 83  | 13 38 55 81 98  | 15 33 61 79 94 | 14 35 49 71 101 |
|     |   |   |   |              | 11 31 50 89 100 |                |                 |                |                 |
| 124 | 8 | 6 | 6 |              | 1 2 5 63 121    | 7 39 72 85 98  | 10 20 50 77 104 | 12 35 53 76 88 | 6 15 34 43 49   |
|     |   |   |   |              | 11 55 79 93 110 |                |                 |                |                 |
| 125 | 8 | 6 | 6 |              | 1 2 4 7 120     | 8 16 32 56 85  | 17 37 54 76 103 | 10 23 57 70 80 | 11 30 41 74 92  |

|     |    |   |   |                                                  |                                     |                                    |                  |                  |
|-----|----|---|---|--------------------------------------------------|-------------------------------------|------------------------------------|------------------|------------------|
| 126 | 8  | 7 | 7 | 15 36 61 82 97<br>1 3 32 95 124<br>8 20 58 70 78 | 6 22 67 83 89<br>9 24 42 93 111     | 11 25 71 85 96                     | 7 26 79 98 105   | 4 17 27 40 44    |
| 127 | 8  | 7 | 7 | 1 3 4 37 94<br>6 19 25 67 85                     | 5 22 27 50 104<br>8 20 46 89 115    | 7 16 47 56 63                      | 14 29 53 88 112  | 10 21 51 62 72   |
| 128 | 8  | 7 | 7 | 1 2 5 65 125<br>12 28 43 97 112                  | 9 38 57 86 95<br>6 24 30 56 102     | 7 21 41 94 114                     | 10 27 37 76 89   | 11 36 58 81 103  |
| 129 | 8  | 7 | 7 | 1 2 4 7 124<br>15 41 64 80 103                   | 10 38 55 83 93<br>14 32 54 72 86    | 11 31 61 81 92                     | 8 27 35 60 104   | 13 34 47 76 100  |
| 130 | 8  | 7 | 7 | 1 2 5 66 127<br>6 39 54 82 97                    | 16 34 57 89 112<br>9 29 40 51 60    | 7 21 45 92 116                     | 12 37 56 86 105  | 10 27 77 94 104  |
| 131 | 8  | 7 | 7 | 1 2 4 7 126<br>14 31 61 84 114                   | 11 26 76 91 102<br>8 27 60 68 112   | 10 32 42 67 106                    | 16 34 54 72 88   | 13 37 58 82 95   |
| 132 | 8  | 7 | 7 | 1 2 5 67 129<br>9 31 51 90 110                   | 6 17 23 69 109<br>10 34 60 84 94    | 13 28 49 96 117                    | 7 19 95 107 114  | 14 30 75 91 105  |
| 133 | 8  | 7 | 7 | 7 14 28 49 105<br>15 37 73 95 110                | 1 2 4 66 70<br>6 40 46 85 94        | 5 24 29 55 107                     | 8 18 90 100 108  | 13 30 57 89 116  |
| 134 | 8  | 7 | 7 | 1 2 5 68 131<br>6 12 24 48 98                    | 10 41 72 93 123<br>9 37 46 90 115   | 7 20 34 47 54                      | 15 32 58 91 117  | 16 38 73 95 111  |
| 135 | 9  | 7 | 7 | 1 2 4 7 130<br>10 37 63 82 108                   | 11 22 44 77 91<br>16 36 52 76 111   | 8 31 70 93 101                     | 15 32 61 89 118  | 13 38 56 81 94   |
| 136 | 9  | 7 | 7 | 1 2 5 69 133<br>10 30 54 92 116                  | 7 14 28 49 101<br>13 26 53 79 104   | 12 41 59 88 100                    | 6 17 23 39 120   | 15 34 71 90 105  |
| 137 | 9  | 7 | 7 | 1 2 4 7 132<br>10 28 74 92 102                   | 8 16 32 56 97<br>13 33 83 103 116   | 14 29 51 100 122                   | 11 38 68 95 106  | 17 36 75 94 111  |
| 138 | 9  | 7 | 7 | 1 2 5 70 135<br>10 39 66 95 105                  | 7 14 28 49 103<br>12 30 74 92 104   | 6 26 32 77 93                      | 9 40 57 88 97    | 11 24 47 102 125 |
| 139 | 9  | 7 | 7 | 1 2 4 7 134<br>15 36 51 81 109                   | 8 16 32 56 99<br>14 37 55 78 92     | 11 33 44 82 101                    | 10 27 62 79 89   | 13 39 59 93 113  |
| 140 | 9  | 7 | 7 | 7 14 28 63 119<br>9 25 76 92 101                 | 1 2 5 71 137<br>12 32 55 97 120     | 13 31 44 81 103                    | 6 17 99 110 116  | 15 34 61 94 121  |
| 141 | 9  | 7 | 7 | 1 2 4 7 136<br>10 28 71 89 99                    | 8 16 32 56 101<br>14 31 64 97 114   | 11 30 65 87 122                    | 15 36 82 103 118 | 13 39 68 94 107  |
| 142 | 9  | 7 | 7 | 1 2 5 72 139<br>11 29 48 105 124                 | 7 14 28 49 107<br>6 15 89 98 104    | 10 22 32 55 119                    | 16 36 52 77 117  | 13 43 69 82 125  |
| 143 | 9  | 7 | 7 | 1 2 4 7 138<br>14 33 58 99 124                   | 8 16 32 56 103<br>13 39 75 101 114  | 11 31 54 100 123                   | 15 37 64 94 121  | 10 28 45 63 73   |
| 144 | 9  | 8 | 8 | 6 12 24 48 108<br>8 29 45 107 123                | 1 20 52 71 72<br>4 38 47 81 85      | 11 33 46 68 79<br>10 49 64 90 105  | 14 31 58 75 89   | 2 5 7 30 121     |
| 145 | 9  | 8 | 8 | 1 2 4 9 142<br>14 32 79 97 111                   | 16 35 73 92 108<br>13 36 58 100 122 | 11 39 63 93 117<br>20 41 61 90 116 | 6 33 50 101 118  | 10 25 56 99 130  |
| 146 | 9  | 8 | 8 | 1 2 5 74 143<br>12 40 55 83 95                   | 10 21 46 110 135<br>7 37 56 97 116  | 14 34 61 99 126<br>9 26 96 113 122 | 6 29 45 107 123  | 13 31 44 66 124  |
| 147 | 9  | 8 | 8 | 7 14 28 49 112<br>11 30 71 90 101                | 8 16 32 56 115<br>4 27 70 93 97     | 1 3 13 135 145<br>6 39 61 92 114   | 17 51 69 95 113  | 9 29 38 74 111   |
| 148 | 9  | 8 | 8 | 1 2 5 75 145<br>7 39 56 99 116                   | 13 27 41 54 108<br>6 37 52 102 117  | 9 19 35 122 138<br>18 38 62 82 100 | 11 33 90 112 123 | 12 42 63 97 118  |
| 149 | 9  | 8 | 8 | 1 2 4 7 144<br>10 30 51 108 129                  | 14 28 56 73 132<br>13 40 53 88 114  | 19 43 65 103 125<br>8 23 72 87 95  | 11 36 69 94 105  | 16 34 63 102 131 |
| 150 | 10 | 8 | 8 | 1 2 5 76 147<br>11 29 40 59 131                  | 7 14 28 49 115<br>10 27 37 60 127   | 13 39 52 93 109<br>20 44 64 89 125 | 6 15 53 62 68    | 12 34 85 107 119 |

|     |    |   |   |                                   |                                     |                                      |                                       |                  |
|-----|----|---|---|-----------------------------------|-------------------------------------|--------------------------------------|---------------------------------------|------------------|
| 151 | 10 | 8 | 8 | 1 2 4 7 146<br>17 37 67 87 104    | 8 16 32 56 111<br>10 46 61 100 115  | 11 33 44 85 110<br>14 35 73 94 108   | 13 31 58 76 89                        | 19 42 68 102 128 |
| 152 | 10 | 8 | 8 | 8 16 32 56 120<br>3 50 63 92 105  | 1 2 6 77 148<br>12 34 46 85 113     | 9 26 108 125 134<br>11 30 65 98 133  | 14 37 57 80 94                        | 7 38 59 100 121  |
| 153 | 10 | 8 | 8 | 1 2 4 7 148<br>11 31 78 98 109    | 8 16 32 56 113<br>13 43 65 95 108   | 10 33 79 102 112<br>17 36 53 90 116  | 14 42 76 91 125                       | 18 39 68 103 132 |
| 154 | 10 | 8 | 8 | 1 2 5 78 151<br>9 51 62 101 112   | 15 30 60 79 105<br>6 34 40 69 125   | 21 43 65 108 131<br>16 36 54 74 122  | 12 25 82 95 107                       | 7 17 31 130 144  |
| 155 | 10 | 8 | 8 | 1 2 4 7 150<br>14 47 67 100 114   | 8 16 32 56 115<br>11 34 61 84 95    | 13 39 65 104 117<br>15 36 58 112 134 | 19 44 81 106 125                      | 10 28 45 120 137 |
| 156 | 10 | 8 | 8 | 1 2 5 79 153<br>6 29 102 125 131  | 7 14 28 49 121<br>17 41 61 112 132  | 11 27 59 70 140<br>12 30 88 106 118  | 9 19 45 55 64                         | 13 47 69 103 116 |
| 157 | 10 | 8 | 8 | 1 2 4 7 152<br>19 44 77 102 121   | 8 16 32 56 117<br>14 49 71 106 120  | 10 20 31 73 146<br>13 30 59 111 140  | 15 43 69 97 112                       | 18 41 68 107 134 |
| 158 | 10 | 8 | 8 | 1 2 5 80 155<br>15 45 76 106 121  | 7 14 28 49 123<br>12 29 48 65 77    | 9 41 50 96 112<br>18 43 69 107 133   | 10 23 111 124 134                     | 6 33 72 92 131   |
| 159 | 10 | 8 | 8 | 1 2 4 7 154<br>18 39 76 101 138   | 8 16 32 56 119<br>15 44 59 94 124   | 11 22 42 95 117<br>14 28 66 121 140  | 13 36 82 105 118                      | 10 27 61 78 88   |
| 160 | 10 | 9 | 9 | 8 16 32 72 136<br>10 21 31 84 107 | 7 14 41 87 133<br>5 33 70 98 103    | 3 9 12 47 125<br>2 52 71 91 110      | 1 18 43 60 61<br>4 26 55 109 138      | 13 49 79 94 124  |
| 161 | 10 | 8 | 8 | 1 2 4 7 156<br>14 59 80 95 116    | 8 16 32 56 121<br>17 37 55 75 92    | 19 49 79 98 139<br>10 33 61 84 94    | 13 39 52 83 130                       | 11 46 73 108 119 |
| 162 | 10 | 9 | 9 | 9 18 36 63 108<br>12 25 37 65 134 | 1 2 8 82 156<br>19 41 92 114 133    | 3 23 58 107 142<br>4 60 75 91 106    | 11 44 61 94 105<br>10 34 96 120 130   | 5 26 64 103 141  |
| 163 | 10 | 9 | 9 | 1 2 4 7 158<br>17 39 75 97 114    | 14 42 56 93 126<br>8 18 99 109 117  | 15 31 74 104 147<br>11 34 63 111 140 | 20 41 61 96 128<br>13 38 98 123 136   | 19 45 69 113 137 |
| 164 | 10 | 9 | 9 | 1 2 5 83 161<br>9 32 41 93 112    | 13 51 64 114 139<br>7 22 29 69 124  | 10 44 54 97 121<br>11 31 48 68 79    | 14 49 70 105 119<br>12 28 118 134 146 | 6 33 72 98 137   |
| 165 | 11 | 9 | 9 | 1 2 4 7 160<br>11 57 77 99 119    | 16 32 64 85 112<br>17 52 76 106 130 | 13 36 104 127 140<br>15 34 75 94 109 | 14 40 58 84 98<br>8 45 73 110 118     | 10 39 49 82 132  |

Examples of maximal  $(v, 7, 2, 1)$  OOCs

| $v$ | $b_O$ | $b_1$ | $M$ | all        | codeword-sets    |                   |                   |                   |  |
|-----|-------|-------|-----|------------|------------------|-------------------|-------------------|-------------------|--|
| 67  | 3     | 2     | 2   | 34         | 1 2 5 16 53 64   | 6 13 23 33 46 55  |                   |                   |  |
| 68  | 3     | 2     | 2   | 108        | 1 2 5 18 52 65   | 6 12 26 35 45 54  |                   |                   |  |
| 69  | 3     | 2     | 2   | 132        | 1 2 5 15 56 66   | 6 12 23 42 49 58  |                   |                   |  |
| 70  | 3     | 2     | 2   | 487        | 1 2 5 15 57 67   | 6 12 23 32 39 59  |                   |                   |  |
| 71  | 3     | 2     | 2   | 384        | 1 2 5 12 61 68   | 6 19 25 39 48 57  |                   |                   |  |
| 72  | 3     | 3     | 2   | 1497       | 1 2 5 19 55 69   | 6 16 27 39 51 62  |                   |                   |  |
| 73  | 3     | 3     | 2   | 1208       | 1 2 5 14 61 70   | 6 16 27 38 48 54  |                   |                   |  |
| 74  | 3     | 3     | 2   | 3735       | 1 2 5 12 64 71   | 6 19 25 39 48 57  |                   |                   |  |
| 75  | 3     | 3     | 2   | 6087       | 1 2 4 25 51 72   | 8 18 35 45 53 64  |                   |                   |  |
| 76  | 3     | 3     | 2   | 12432      | 1 2 5 20 58 73   | 6 17 30 43 54 60  |                   |                   |  |
| 77  | 3     | 3     | 2   | 13506      | 1 2 4 36 43 74   | 8 18 33 48 58 66  |                   |                   |  |
| 78  | 3     | 3     | 2   | 52070      | 1 2 4 26 53 75   | 9 20 30 41 50 64  |                   |                   |  |
| 79  | 3     | 3     | 2   | 32364      | 1 2 4 37 44 76   | 6 12 20 30 61 71  |                   |                   |  |
| 80  | 3     | 3     | 2   | 132413     | 1 2 5 21 61 77   | 7 14 25 42 52 69  |                   |                   |  |
| 81  | 3     | 3     | 2   | 125433     | 1 2 4 27 55 78   | 9 20 31 40 52 69  |                   |                   |  |
| 82  | 3     | 3     | 2   | 287830     | 1 2 5 11 73 79   | 7 19 32 47 59 66  |                   |                   |  |
| 83  | 3     | 3     | 2   | 240606     | 1 2 4 39 46 80   | 8 16 26 40 59 73  |                   |                   |  |
| 84  | 3     | 3     | 2   | 1279965    | 1 2 5 22 64 81   | 6 15 29 43 52 58  |                   |                   |  |
| 85  | 4     | 3     | 3   | 1          | 1 2 9 23 64 78   | 5 20 32 45 58 70  | 4 10 28 46 52 56  |                   |  |
| 86  | 4     | 3     | 3   | 1          | 1 2 10 41 47 78  | 3 15 36 57 69 72  | 4 11 27 34 38 62  |                   |  |
| 87  | 4     | 3     | 3   | 5          | 1 2 5 17 72 84   | 9 19 40 50 59 73  | 6 13 24 35 42 48  |                   |  |
| 88  | 4     | 3     | 3   | 2          | 1 2 16 23 67 74  | 3 9 12 45 50 55   | 4 8 28 39 57 68   |                   |  |
| 89  | 4     | 3     | 3   | 8          | 1 2 5 25 66 86   | 9 19 36 49 62 79  | 6 18 39 51 57 73  |                   |  |
| 90  | 4     | 3     | 3   | 23         | 1 2 5 24 68 87   | 10 21 36 50 64 79 | 6 13 31 48 65 83  |                   |  |
| 91  | 4     | 3     | 3   | 44         | 1 2 5 15 78 88   | 9 20 31 40 52 79  | 6 23 30 47 53 72  |                   |  |
| 92  | 4     | 3     | 3   | 84         | 1 2 5 24 70 89   | 6 17 45 56 62 77  | 7 20 33 40 58 74  |                   |  |
| 93  | 4     | 3     | 3   | $\geq 159$ | 1 2 5 15 80 90   | 6 17 36 47 53 73  | 7 29 38 50 62 71  |                   |  |
| 94  | 4     | 3     | 3   | $\geq 136$ | 1 2 5 15 81 91   | 7 16 37 58 67 74  | 6 12 23 45 56 68  |                   |  |
| 95  | 4     | 3     | 3   |            | 1 2 5 12 85 92   | 9 25 39 53 69 78  | 6 19 37 55 68 74  |                   |  |
| 96  | 4     | 4     | 3   |            | 1 2 5 25 73 93   | 6 21 40 51 62 81  | 7 16 42 49 59 86  |                   |  |
| 97  | 4     | 4     | 3   |            | 1 2 5 14 85 94   | 6 22 37 52 68 74  | 7 18 39 50 57 77  |                   |  |
| 98  | 4     | 4     | 3   |            | 1 2 5 12 88 95   | 9 25 34 52 66 80  | 6 19 39 56 69 75  |                   |  |
| 99  | 4     | 4     | 3   |            | 1 2 4 33 67 96   | 10 24 37 50 64 74 | 8 17 60 69 77 88  |                   |  |
| 100 | 4     | 4     | 3   |            | 1 2 5 26 76 97   | 6 17 44 53 62 89  | 7 19 49 61 68 84  |                   |  |
| 101 | 4     | 4     | 3   |            | 1 2 4 48 55 98   | 6 14 31 39 45 73  | 9 18 29 41 78 90  |                   |  |
| 102 | 4     | 4     | 3   |            | 1 2 4 34 69 99   | 8 17 57 66 74 88  | 6 16 29 54 79 92  |                   |  |
| 103 | 4     | 4     | 3   |            | 1 2 4 49 56 100  | 6 12 37 46 69 78  | 8 16 26 43 76 93  |                   |  |
| 104 | 4     | 4     | 3   |            | 1 2 5 27 79 101  | 7 17 63 73 80 92  | 6 21 39 55 71 89  |                   |  |
| 105 | 4     | 4     | 3   |            | 1 2 4 35 71 102  | 11 25 48 62 73 89 | 9 26 39 56 65 85  |                   |  |
| 106 | 5     | 4     | 3   |            | 1 2 5 11 97 103  | 13 26 41 58 74 91 | 7 29 36 59 71 83  |                   |  |
| 107 | 5     | 4     | 3   |            | 1 2 4 50 53 57   | 6 12 21 38 81 98  | 5 28 36 44 67 72  |                   |  |
| 108 | 5     | 4     | 3   |            | 1 2 5 28 82 105  | 6 13 46 57 68 101 | 10 29 47 59 71 89 |                   |  |
| 109 | 5     | 4     | 4   |            | 1 2 6 20 91 105  | 7 22 29 56 69 82  | 3 12 35 58 67 70  | 8 16 33 44 81 92  |  |
| 110 | 5     | 4     | 4   |            | 1 2 5 41 71 107  | 7 19 32 45 57 64  | 6 17 27 37 48 54  | 14 28 43 61 77 95 |  |
| 111 | 5     | 4     | 4   |            | 1 2 10 14 99 103 | 3 20 27 44 47 79  | 5 16 39 62 73 78  | 6 21 36 42 61 92  |  |
| 112 | 5     | 4     | 4   |            | 1 2 6 29 85 108  | 9 22 35 44 59 97  | 7 14 25 55 71 101 | 8 20 39 60 81 100 |  |
| 113 | 5     | 4     | 4   |            | 1 2 5 20 95 110  | 6 16 37 47 53 83  | 11 25 54 68 79 96 | 9 22 49 61 73 100 |  |
| 114 | 5     | 4     | 4   |            | 1 2 5 35 81 111  | 6 19 29 60 91 101 | 9 26 37 48 65 74  | 7 25 43 50 70 94  |  |
| 115 | 5     | 4     | 4   |            | 1 2 5 15 102 112 | 9 20 41 52 61 88  | 7 19 31 38 64 89  | 6 22 59 75 81 98  |  |

|     |   |   |   |                   |                     |                     |                     |                     |
|-----|---|---|---|-------------------|---------------------|---------------------|---------------------|---------------------|
| 116 | 5 | 4 | 4 | 1 2 5 30 88 113   | 7 17 27 34 48 102   | 11 22 37 61 77 101  | 6 19 42 65 78 84    |                     |
| 117 | 5 | 4 | 4 | 1 2 4 40 78 114   | 6 14 31 48 56 62    | 9 19 37 63 89 107   | 11 23 35 46 68 95   |                     |
| 118 | 5 | 4 | 4 | 1 2 5 15 105 115  | 7 29 41 63 70 94    | 11 27 38 57 78 99   | 6 23 43 60 66 92    |                     |
| 119 | 5 | 4 | 4 | 1 2 5 12 109 116  | 13 26 44 58 87 101  | 9 25 49 73 89 98    | 6 23 42 59 65 92    |                     |
| 120 | 5 | 5 | 4 | 1 2 5 12 109 116  | 13 26 44 58 87 101  | 9 25 49 73 89 98    | 6 23 42 59 65 92    |                     |
| 121 | 5 | 5 | 4 | 1 2 5 11 112 118  | 7 25 47 69 87 94    | 13 26 43 58 89 104  | 12 28 51 67 79 100  |                     |
| 122 | 5 | 5 | 4 | 1 2 5 11 113 119  | 7 26 49 72 91 98    | 12 27 63 78 90 106  | 13 30 47 60 82 100  |                     |
| 123 | 5 | 5 | 4 | 1 2 4 41 83 120   | 9 28 45 64 73 98    | 11 27 43 54 74 103  | 8 18 75 85 93 108   |                     |
| 124 | 5 | 5 | 4 | 1 2 5 32 94 121   | 7 20 33 40 77 87    | 6 15 29 65 101 115  | 11 22 39 64 82 107  |                     |
| 125 | 5 | 5 | 4 | 1 2 4 59 62 66    | 6 26 46 52 80 97    | 8 18 56 94 104 112  | 5 14 89 98 103 114  |                     |
| 126 | 5 | 5 | 4 | 3 6 33 42 87 96   | 2 4 19 60 70 111    | 12 26 47 69 91 112  | 7 25 53 71 78 102   |                     |
| 127 | 6 | 5 | 4 | 1 2 4 60 63 67    | 10 26 42 52 83 96   | 5 11 17 22 50 99    | 8 37 46 55 84 92    |                     |
| 128 | 6 | 5 | 4 | 1 2 5 33 97 125   | 7 21 67 81 88 108   | 9 22 51 80 93 102   | 6 12 23 62 78 117   |                     |
| 129 | 6 | 5 | 4 | 1 2 4 43 87 126   | 9 19 29 38 59 108   | 6 23 37 51 68 74    | 11 22 35 47 104 116 |                     |
| 130 | 6 | 5 | 4 | 1 2 5 11 121 127  | 7 22 45 68 83 90    | 13 31 44 70 87 104  | 12 28 53 78 94 106  |                     |
| 131 | 6 | 5 | 4 | 1 2 4 62 65 69    | 8 21 34 42 59 114   | 9 28 37 57 84 111   | 5 11 23 35 41 46    |                     |
| 132 | 6 | 5 | 4 | 1 2 5 34 100 129  | 7 14 35 62 84 111   | 10 30 53 71 89 112  | 6 12 25 51 93 119   |                     |
| 133 | 6 | 5 | 5 | 1 2 5 41 94 130   | 9 18 33 52 99 118   | 12 26 42 58 72 84   | 10 20 37 65 88 116  | 6 13 70 77 83 108   |
| 134 | 6 | 5 | 5 | 1 2 5 26 110 131  | 6 19 41 63 76 82    | 12 40 55 73 91 106  | 7 14 23 53 95 125   | 11 31 48 65 85 96   |
| 135 | 6 | 5 | 5 | 1 2 5 21 116 132  | 12 26 41 56 70 82   | 10 23 48 61 71 103  | 9 27 45 54 76 113   | 6 17 52 63 69 102   |
| 136 | 6 | 5 | 5 | 1 2 12 35 103 126 | 5 25 30 76 83 90    | 13 26 44 63 99 118  | 8 16 48 57 95 104   | 4 28 43 70 97 112   |
| 137 | 6 | 5 | 5 | 1 2 5 12 127 134  | 9 32 51 70 93 102   | 13 29 47 65 81 94   | 6 31 55 79 104 110  | 14 28 54 74 91 111  |
| 138 | 6 | 5 | 5 | 1 2 5 44 96 135   | 7 16 64 73 80 109   | 6 25 55 85 104 110  | 10 20 37 51 107 121 | 11 23 35 46 61 123  |
| 139 | 6 | 5 | 5 | 1 2 5 12 129 136  | 14 34 55 75 89 114  | 13 30 56 82 99 112  | 9 28 37 72 88 104   | 6 24 42 48 71 116   |
| 140 | 6 | 5 | 5 | 1 2 5 36 106 137  | 12 33 60 76 92 119  | 11 24 61 98 111 122 | 6 26 51 73 95 120   | 7 14 63 72 82 91    |
| 141 | 6 | 5 | 5 | 1 2 4 48 94 138   | 12 25 41 57 70 82   | 10 20 31 53 108 130 | 6 14 40 66 74 80    | 9 18 37 72 87 122   |
| 142 | 6 | 5 | 5 | 1 2 5 11 133 139  | 12 27 55 70 82 112  | 17 34 56 79 97 120  | 7 26 51 76 95 102   | 13 29 65 81 94 118  |
| 143 | 6 | 5 | 5 | 1 2 4 69 76 140   | 6 12 23 36 119 132  | 10 29 48 58 90 111  | 8 16 43 57 102 116  | 9 18 40 55 106 121  |
| 144 | 6 | 6 | 5 | 1 2 5 37 109 141  | 11 22 42 55 111 124 | 7 14 41 66 92 117   | 10 28 38 67 91 115  | 6 12 21 70 86 135   |
| 145 | 6 | 6 | 5 | 1 2 4 69 72 76    | 8 26 59 92 110 118  | 6 12 25 36 121 132  | 9 23 40 54 63 104   | 5 15 20 52 62 108   |
| 146 | 6 | 6 | 5 | 1 2 5 11 137 143  | 13 26 57 74 98 115  | 15 34 62 81 96 121  | 16 37 55 76 92 119  | 7 29 52 75 97 104   |
| 147 | 6 | 6 | 5 | 1 2 4 49 99 144   | 8 16 40 51 112 123  | 9 26 63 80 89 118   | 6 25 66 85 91 119   | 13 36 57 78 101 114 |
| 148 | 7 | 6 | 5 | 1 2 5 38 112 145  | 7 21 79 93 100 124  | 6 28 34 81 91 101   | 9 18 60 77 89 106   | 13 39 65 78 105 121 |
| 149 | 7 | 6 | 5 | 1 2 4 71 74 78    | 5 10 32 49 93 132   | 6 21 29 37 52 58    | 9 20 62 104 115 124 | 12 30 48 60 98 111  |
| 150 | 7 | 6 | 5 | 1 2 4 50 101 147  | 9 27 47 67 85 94    | 8 22 63 79 95 136   | 10 31 52 62 91 121  | 6 17 43 78 113 139  |
| 151 | 7 | 6 | 5 | 1 2 4 72 75 79    | 5 15 32 42 47 99    | 13 31 49 62 95 118  | 8 16 38 66 101 129  | 6 12 26 51 112 137  |
| 152 | 7 | 6 | 5 | 1 2 5 39 115 149  | 7 22 36 50 65 72    | 6 18 69 79 89 140   | 11 35 59 70 103 119 | 13 26 45 66 112 133 |
| 153 | 7 | 6 | 5 | 1 2 4 51 103 150  | 8 24 40 64 72 105   | 6 12 35 73 92 130   | 14 28 53 83 98 128  | 9 18 31 77 94 140   |
